# Supplementary material for: Time-series expression profile analysis to identify important modules and biomarkers in early phase of acute lung injury based on WGCNA
Source: Research Square preprint supplement (doi:10.21203/rs.3.rs-1300671/v1), 2022-02-10
Supplement: Supplementary file 1 [file 7f8c4d2092f1d436ae8a39e8.xlsx]

## Sheet: Information Of Samples
					Supplementary Table S1:Information Of 48 Samples
					Sample	Group	Time（hr）	0.5hr	1hr	4hr	8hr	12hr	24hr	48hr	72hr
					GSM49328	normal	0.5	1	0	0	0	0	0	0	0		Supplementary Table S1: Lung tissue samples were collected from air- or phosgene-exposed mice at 0.5, 1, 4, 8, 12, 24, 48, and 72 hr post-exposure. hr=hour, 1=YES, 0=NO, normal= air-exposed,control= phosgene-exposed
					GSM49330	normal	0.5	1	0	0	0	0	0	0	0
					GSM49332	normal	0.5	1	0	0	0	0	0	0	0
					GSM49336	normal	1	0	1	0	0	0	0	0	0
					GSM49338	normal	1	0	1	0	0	0	0	0	0
					GSM49340	normal	1	0	1	0	0	0	0	0	0
					GSM49342	normal	4	0	0	1	0	0	0	0	0
					GSM49344	normal	4	0	0	1	0	0	0	0	0
					GSM49346	normal	4	0	0	1	0	0	0	0	0
					GSM49350	normal	8	0	0	0	1	0	0	0	0
					GSM49352	normal	8	0	0	0	1	0	0	0	0
					GSM49380	normal	8	0	0	0	1	0	0	0	0
					GSM49354	normal	12	0	0	0	0	1	0	0	0
					GSM49356	normal	12	0	0	0	0	1	0	0	0
					GSM49360	normal	12	0	0	0	0	1	0	0	0
					GSM49362	normal	24	0	0	0	0	0	1	0	0
					GSM49364	normal	24	0	0	0	0	0	1	0	0
					GSM49366	normal	24	0	0	0	0	0	1	0	0
					GSM49368	normal	48	0	0	0	0	0	0	1	0
					GSM49370	normal	48	0	0	0	0	0	0	1	0
					GSM49382	normal	48	0	0	0	0	0	0	1	0
					GSM49372	normal	72	0	0	0	0	0	0	0	1
					GSM49386	normal	72	0	0	0	0	0	0	0	1
					GSM49388	normal	72	0	0	0	0	0	0	0	1
					GSM49426	control	0.5	1	0	0	0	0	0	0	0
					GSM49428	control	0.5	1	0	0	0	0	0	0	0
					GSM49430	control	0.5	1	0	0	0	0	0	0	0
					GSM49334	control	1	0	1	0	0	0	0	0	0
					GSM49348	control	1	0	1	0	0	0	0	0	0
					GSM49358	control	1	0	1	0	0	0	0	0	0
					GSM49390	control	4	0	0	1	0	0	0	0	0
					GSM49392	control	4	0	0	1	0	0	0	0	0
					GSM49394	control	4	0	0	1	0	0	0	0	0
					GSM49396	control	8	0	0	0	1	0	0	0	0
					GSM49398	control	8	0	0	0	1	0	0	0	0
					GSM49400	control	8	0	0	0	1	0	0	0	0
					GSM49402	control	12	0	0	0	0	1	0	0	0
					GSM49404	control	12	0	0	0	0	1	0	0	0
					GSM49406	control	12	0	0	0	0	1	0	0	0
					GSM49408	control	24	0	0	0	0	0	1	0	0
					GSM49410	control	24	0	0	0	0	0	1	0	0
					GSM49412	control	24	0	0	0	0	0	1	0	0
					GSM49414	control	48	0	0	0	0	0	0	1	0
					GSM49416	control	48	0	0	0	0	0	0	1	0
					GSM49418	control	48	0	0	0	0	0	0	1	0
					GSM49420	control	72	0	0	0	0	0	0	0	1
					GSM49422	control	72	0	0	0	0	0	0	0	1
					GSM49424	control	72	0	0	0	0	0	0	0	1
					hr=hour 1=YES, 0=NO, normal=air-exposed, control=phosgene-exposed
