# Supplementary material for: Time-series expression profile analysis to identify important modules and biomarkers in early phase of acute lung injury based on WGCNA
Source: Research Square preprint supplement (doi:10.21203/rs.3.rs-1300671/v1), 2022-02-10
Supplement: Supplementary file 2 [file c93c02d5f5d1dda75bdb99f2.xlsx]

## Sheet: Soft power value
					Supplementary Table S2 The Result Of Power Estimation
					Power	fitIndices.SFT.R.sq	fitIndices.slope	fitIndices.truncated.R.sq	fitIndices.mean.k.	fitIndices.median.k.	fitIndices.max.k.
					1	0.00485081	0.126646	0.669613	879.224	909.487	1431.13
					2	0.279726	-0.757884	0.835511	356.015	354.947	816.621
					3	0.561499	-1.14188	0.934491	167.817	156.909	505.481
					4	0.681247	-1.35644	0.968659	86.9821	74.6108	329.95
					5	0.760821	-1.50416	0.987005	48.2444	37.833	224.138
					6	0.802582	-1.60515	0.99356	28.1913	19.996	157.219
					7	0.845465	-1.66474	0.997574	17.1826	10.8913	113.268
					8	0.866284	-1.73539	0.995243	10.8482	6.1072	83.4873
					9	0.886167	-1.76383	0.99888	7.05854	3.54791	62.7663
					10	0.906318	-1.76914	0.99818	4.71495	2.10357	48.0137
					12	0.922397	-1.77914	0.997685	2.24991	0.7881	29.3697
					14	0.931375	-1.76653	0.99783	1.15738	0.315271	18.8709
					16	0.944959	-1.71695	0.998202	0.633626	0.130573	12.6217
					18	0.954063	-1.68911	0.997286	0.365684	0.0576773	8.7314
					20	0.948503	-1.65887	0.978391	0.220857	0.0262463	6.33826
					Supplementary Table S2: The various powers were caculated by the function “sft$powerEstimate”in WGCNA.The bold line indicates the optimal soft threshold,β=8.
