# Supplementary material for: Time-series expression profile analysis to identify important modules and biomarkers in early phase of acute lung injury based on WGCNA
Source: Research Square preprint supplement (doi:10.21203/rs.3.rs-1300671/v1), 2022-02-10
Supplement: Supplementary file 3 [file f9414a3d6d91032b4156ca9b.xlsx]

## Sheet: Sheet1
Supplementary Table S3: Gene anotation in red module
Gene Symbol	Gene ID	Gene Title	Terms Of Biological Process (GO)	Terms Of KEGG Pathway
Naxe	246703	NAD(P)HX epimerase	GO:0031580 membrane raft distribution;GO:0051665 membrane raft localization;GO:0031579 membrane raft organization
Scd1	20249	stearoyl-Coenzyme A desaturase 1	GO:1903699 tarsal gland development;GO:1903964 monounsaturated fatty acid metabolic process;GO:1903966 monounsaturated fatty acid biosynthetic process	(ko01040)Biosynthesis of unsaturated fatty acids; (mmu01040)Biosynthesis of unsaturated fatty acids; (mmu01212)Fatty acid metabolism
Cirbp	12696	cold inducible RNA binding protein	GO:0070417 cellular response to cold;GO:0034063 stress granule assembly;GO:0048026 positive regulation of mRNA splicing, via spliceosome
Fkbp4	14228	FK506 binding protein 4	GO:0006463 steroid hormone receptor complex assembly;GO:0006825 copper ion transport;GO:0031115 negative regulation of microtubule polymerization	(ko04915)Estrogen signaling pathway; (mmu04915)Estrogen signaling pathway
Gabarapl1	57436	gamma-aminobutyric acid (GABA) A receptor-associated protein-like 1	GO:0006995 cellular response to nitrogen starvation;GO:0043562 cellular response to nitrogen levels;GO:0000422 autophagy of mitochondrion	(ko04136)Autophagy - other; (mmu04136)Autophagy - other; (ko04137)Mitophagy - animal
Dctpp1	66422	dCTP pyrophosphatase 1	GO:0006253 dCTP catabolic process;GO:0046065 dCTP metabolic process;GO:0009213 pyrimidine deoxyribonucleoside triphosphate catabolic process	(ko00240)Pyrimidine metabolism; (mmu00240)Pyrimidine metabolism; (mmu01100)Metabolic pathways
Oat	18242	ornithine aminotransferase	GO:0010121 arginine catabolic process to proline via ornithine;GO:0019493 arginine catabolic process to proline;GO:0019544 arginine catabolic process to glutamate	(ko00330)Arginine and proline metabolism; (mmu00330)Arginine and proline metabolism; (mmu01100)Metabolic pathways
Cept1	99712	choline/ethanolaminephosphotransferase 1	GO:0006646 phosphatidylethanolamine biosynthetic process;GO:0006656 phosphatidylcholine biosynthetic process;GO:0046337 phosphatidylethanolamine metabolic process	(mmu00440)Phosphonate and phosphinate metabolism; (mmu)Phosphatidylcholine (PC) biosynthesis, choline => PC; (M00090)Phosphatidylcholine (PC) biosynthesis, choline => PC
Ndufb3	66495	NADH:ubiquinone oxidoreductase subunit B3	GO:0010257 NADH dehydrogenase complex assembly;GO:0032981 mitochondrial respiratory chain complex I assembly;GO:0033108 mitochondrial respiratory chain complex assembly	(ko00190)Oxidative phosphorylation; (mmu05012)Parkinson's disease; (ko04932)Non-alcoholic fatty liver disease (NAFLD)
Slc44a4	70129	solute carrier family 44, member 4	GO:0030974 thiamine pyrophosphate transmembrane transport;GO:0008292 acetylcholine biosynthetic process;GO:1900620 acetate ester biosynthetic process	(ko05231)Choline metabolism in cancer; (mmu05231)Choline metabolism in cancer
Acss1	68738	acyl-CoA synthetase short-chain family member 1	GO:0019427 acetyl-CoA biosynthetic process from acetate;GO:0019413 acetate biosynthetic process;GO:0019542 propionate biosynthetic process	(ko00640)Propanoate metabolism; (mmu00640)Propanoate metabolism; (ko00620)Pyruvate metabolism
C1galt1c1	59048	C1GALT1-specific chaperone 1	GO:0016267 O-glycan processing, core 1;GO:0016266 O-glycan processing;GO:0036344 platelet morphogenesis	(mmu)O-glycan biosynthesis, mucin type core; (M00056)O-glycan biosynthesis, mucin type core; (mmu00512)Mucin type O-glycan biosynthesis
Pde6d	18582	phosphodiesterase 6D, cGMP-specific, rod, delta	GO:0007602 phototransduction;GO:0009583 detection of light stimulus;GO:0009582 detection of abiotic stimulus	(ko00230)Purine metabolism; (mmu00230)Purine metabolism
Nr1d2	353187	nuclear receptor subfamily 1, group D, member 2	GO:2001014 regulation of skeletal muscle cell differentiation;GO:0097009 energy homeostasis;GO:0048512 circadian behavior
Emp3	13732	epithelial membrane protein 3	GO:0032060 bleb assembly;GO:0120031 plasma membrane bounded cell projection assembly;GO:0030031 cell projection assembly
Usp2	53376	ubiquitin specific peptidase 2	GO:0048642 negative regulation of skeletal muscle tissue development;GO:0045843 negative regulation of striated muscle tissue development;GO:0048635 negative regulation of muscle organ development
Nampt	59027	nicotinamide phosphoribosyltransferase	GO:0014916 regulation of lung blood pressure;GO:0009435 NAD biosynthetic process;GO:0019359 nicotinamide nucleotide biosynthetic process	(ko00760)Nicotinate and nicotinamide metabolism; (mmu00760)Nicotinate and nicotinamide metabolism; (ko04621)NOD-like receptor signaling pathway
Rab27b	80718	RAB27B, member RAS oncogene family	GO:0099641 anterograde axonal protein transport;GO:1905383 protein localization to presynapse;GO:0099640 axo-dendritic protein transport	(ko04972)Pancreatic secretion; (mmu04972)Pancreatic secretion
Amz2	13929	archaelysin family metallopeptidase 2	GO:0006508 proteolysis;GO:0019538 protein metabolic process;GO:1901564 organonitrogen compound metabolic process
Grina	66168	glutamate receptor, ionotropic, N-methyl D-aspartate-associated protein 1 (glutamate binding)	GO:1902236 negative regulation of endoplasmic reticulum stress-induced intrinsic apoptotic signaling pathway;GO:0032469 endoplasmic reticulum calcium ion homeostasis;GO:1902235 regulation of endoplasmic reticulum stress-induced intrinsic apoptotic signaling pathway
Per2	18627	period circadian clock 2	GO:0051941 regulation of amino acid uptake involved in synaptic transmission;GO:0051946 regulation of glutamate uptake involved in transmission of nerve impulse;GO:0060567 negative regulation of DNA-templated transcription, termination	(ko04710)Circadian rhythm; (mmu04710)Circadian rhythm; (ko05202)Transcriptional misregulation in cancer
Calr	12317	calreticulin	GO:0002397 MHC class I protein complex assembly;GO:0002502 peptide antigen assembly with MHC class I protein complex;GO:1901164 negative regulation of trophoblast cell migration	(mmu04612)Antigen processing and presentation; (ko04612)Antigen processing and presentation; (ko05142)Chagas disease (American trypanosomiasis)
Prodh	19125	proline dehydrogenase	GO:0010133 proline catabolic process to glutamate;GO:0006562 proline catabolic process;GO:0006560 proline metabolic process	(ko00330)Arginine and proline metabolism; (mmu00330)Arginine and proline metabolism; (mmu01100)Metabolic pathways
Slc6a9	14664	solute carrier family 6 (neurotransmitter transporter, glycine), member 9	GO:0061536 glycine secretion;GO:0061537 glycine secretion, neurotransmission;GO:1904256 positive regulation of iron ion transmembrane transporter activity	(Human)(hsa04721)Synaptic vesicle cycle
Sspn	16651	sarcospan	(Human)GO:0006936 muscle contraction;GO:0003012 muscle system process;GO:0007155 cell adhesion
Grb14	50915	growth factor receptor bound protein 14	GO:1904145 negative regulation of meiotic cell cycle process involved in oocyte maturation;GO:1903537 meiotic cell cycle process involved in oocyte maturation;GO:1903538 regulation of meiotic cell cycle process involved in oocyte maturation
Ppp1r14c	76142	protein phosphatase 1, regulatory inhibitor subunit 14C	GO:0042325 regulation of phosphorylation;GO:0019220 regulation of phosphate metabolic process;GO:0051174 regulation of phosphorus metabolic process
Clca1	23844	chloride channel accessory 1	GO:0006821 chloride transport;GO:0015698 inorganic anion transport;GO:0006816 calcium ion transport	(ko04924)Renin secretion; (mmu04924)Renin secretion; (ko04972)Pancreatic secretion
Spon2	100689	spondin 2, extracellular matrix protein	GO:0043152 induction of bacterial agglutination;GO:0008228 opsonization;GO:0060907 positive regulation of macrophage cytokine production
Pop5	117109	processing of precursor 5, ribonuclease P/MRP family (S. cerevisiae)	GO:0001682 tRNA 5'-leader removal;GO:0099116 tRNA 5'-end processing;GO:0034471 ncRNA 5'-end processing	(ko03008)Ribosome biogenesis in eukaryotes; (mmu03008)Ribosome biogenesis in eukaryotes; (ko03013)RNA transport
Adgrl4	170757	adhesion G protein-coupled receptor L4	GO:0007189 adenylate cyclase-activating G protein-coupled receptor signaling pathway;GO:0007188 adenylate cyclase-modulating G protein-coupled receptor signaling pathway;GO:0065003 protein-containing complex assembly
Tnfrsf1b	21938	tumor necrosis factor receptor superfamily, member 1b	GO:0150098 glial cell-neuron signaling;GO:0003332 negative regulation of extracellular matrix constituent secretion;GO:1902339 positive regulation of apoptotic process involved in morphogenesis	(ko05014)Amyotrophic lateral sclerosis (ALS); (mmu05014)Amyotrophic lateral sclerosis (ALS); (ko04920)Adipocytokine signaling pathway
Tfap4	83383	transcription factor AP4	GO:2001269 positive regulation of cysteine-type endopeptidase activity involved in apoptotic signaling pathway;GO:0043922 negative regulation by host of viral transcription;GO:0043923 positive regulation by host of viral transcription	(ko05205)Proteoglycans in cancer; (mmu05205)Proteoglycans in cancer
Dbp	13170	D site albumin promoter binding protein	GO:0007623 circadian rhythm;GO:0048511 rhythmic process;GO:0045944 positive regulation of transcription by RNA polymerase II
Pmaip1	58801	phorbol-12-myristate-13-acetate-induced protein 1	GO:1900739 regulation of protein insertion into mitochondrial membrane involved in apoptotic signaling pathway;GO:1900740 positive regulation of protein insertion into mitochondrial membrane involved in apoptotic signaling pathway;GO:0001844 protein insertion into mitochondrial membrane involved in apoptotic signaling pathway	(mmu04215)Apoptosis - multiple species; (ko04215)Apoptosis - multiple species; (ko04115)p53 signaling pathway
Krt23	94179	keratin 23	GO:0008150 biological_process	(Human)(hsa04915)Estrogen signaling pathway
Fem1b	14155	fem 1 homolog b	GO:0060743 epithelial cell maturation involved in prostate gland development;GO:0140627 ubiquitin-dependent protein catabolic process via the C-end degron rule pathway;GO:0060742 epithelial cell differentiation involved in prostate gland development
Xpo1	103573	exportin 1	GO:0000055 ribosomal large subunit export from nucleus;GO:0000056 ribosomal small subunit export from nucleus;GO:0000054 ribosomal subunit export from nucleus	(ko03008)Ribosome biogenesis in eukaryotes; (mmu03008)Ribosome biogenesis in eukaryotes; (ko05164)Influenza A
Plin4	57435	perilipin 4		(ko03320)PPAR signaling pathway; (mmu03320)PPAR signaling pathway
Tuba1a	22142	tubulin, alpha 1A	GO:0050807 regulation of synapse organization;GO:0050803 regulation of synapse structure or activity;GO:0050808 synapse organization	(ko04540)Gap junction; (mmu04540)Gap junction; (ko04210)Apoptosis
Fads2	56473	fatty acid desaturase 2	GO:0006633 fatty acid biosynthetic process;GO:0072330 monocarboxylic acid biosynthetic process;GO:0046394 carboxylic acid biosynthetic process	(ko00592)alpha-Linolenic acid metabolism; (mmu00592)alpha-Linolenic acid metabolism; (ko01040)Biosynthesis of unsaturated fatty acids
Alg14	66789	asparagine-linked glycosylation 14	GO:0006488 dolichol-linked oligosaccharide biosynthetic process;GO:0006490 oligosaccharide-lipid intermediate biosynthetic process;GO:0006487 protein N-linked glycosylation	(M00055)N-glycan precursor biosynthesis; (mmu)N-glycan precursor biosynthesis; (ko00510)N-Glycan biosynthesis
Vps37a	52348	vacuolar protein sorting 37A	GO:0043162 ubiquitin-dependent protein catabolic process via the multivesicular body sorting pathway;GO:0006623 protein targeting to vacuole;GO:0072666 establishment of protein localization to vacuole	(ko04144)Endocytosis; (mmu04144)Endocytosis
Rgs2	19735	regulator of G-protein signaling 2	GO:0071877 regulation of adenylate cyclase-inhibiting adrenergic receptor signaling pathway;GO:0086096 adenylate cyclase-inhibiting adrenergic receptor signaling pathway involved in heart process;GO:0140193 regulation of adenylate cyclase-inhibiting adrenergic receptor signaling pathway involved in heart process	(ko04921)Oxytocin signaling pathway; (mmu04921)Oxytocin signaling pathway; (ko04022)cGMP-PKG signaling pathway
Fibin	67606	fin bud initiation factor homolog (zebrafish)	GO:0010042 response to manganese ion;GO:0071548 response to dexamethasone;GO:0070528 protein kinase C signaling
Nagk	56174	N-acetylglucosamine kinase	GO:0019262 N-acetylneuraminate catabolic process;GO:0006054 N-acetylneuraminate metabolic process;GO:0006044 N-acetylglucosamine metabolic process	(ko00520)Amino sugar and nucleotide sugar metabolism; (mmu00520)Amino sugar and nucleotide sugar metabolism; (mmu01100)Metabolic pathways
Elf5	13711	E74-like factor 5	GO:0001712 ectodermal cell fate commitment;GO:0001705 ectoderm formation;GO:0010668 ectodermal cell differentiation	(ko04917)Prolactin signaling pathway; (mmu04917)Prolactin signaling pathway
Hnrnpa2b1	53379	heterogeneous nuclear ribonucleoprotein A2/B1	GO:1905663 positive regulation of telomerase RNA reverse transcriptase activity;GO:1905661 regulation of telomerase RNA reverse transcriptase activity;GO:1990428 miRNA transport
Slc7a11	26570	solute carrier family 7 (cationic amino acid transporter, y+ system), member 11	GO:1901494 regulation of cysteine metabolic process;GO:0031335 regulation of sulfur amino acid metabolic process;GO:1903786 regulation of glutathione biosynthetic process	(ko04216)Ferroptosis; (mmu04216)Ferroptosis
Tex15	104271	testis expressed gene 15	GO:1990511 piRNA biosynthetic process;GO:0034587 piRNA metabolic process;GO:0030539 male genitalia development
Speer4f1	70935	spermatogenesis associated glutamate (E)-rich protein 4F1	GO:0008150 biological_process
Slco2a1	24059	solute carrier organic anion transporter family, member 2a1	GO:0043252 sodium-independent organic anion transport;GO:0015732 prostaglandin transport;GO:0071715 icosanoid transport
Ankrd1	107765	ankyrin repeat domain 1 (cardiac muscle)	GO:0043517 positive regulation of DNA damage response, signal transduction by p53 class mediator;GO:0035994 response to muscle stretch;GO:1901798 positive regulation of signal transduction by p53 class mediator
Acyp1	66204	acylphosphatase 1, erythrocyte (common) type	GO:0008150 biological_process	(ko00620)Pyruvate metabolism; (mmu00620)Pyruvate metabolism
Npas2	18143	neuronal PAS domain protein 2	GO:1903367 positive regulation of fear response;GO:2000987 positive regulation of behavioral fear response;GO:0051775 response to redox state	(ko04710)Circadian rhythm; (mmu04710)Circadian rhythm
Per3	18628	period circadian clock 3	GO:0045187 regulation of circadian sleep/wake cycle, sleep;GO:0050802 circadian sleep/wake cycle, sleep;GO:0043153 entrainment of circadian clock by photoperiod	(ko04710)Circadian rhythm; (mmu04710)Circadian rhythm; (ko05168)Herpes simplex infection
Hspb7	29818	heat shock protein family, member 7 (cardiovascular)	GO:0009408 response to heat;GO:0009266 response to temperature stimulus;GO:0007507 heart development
Lrat	79235	lecithin-retinol acyltransferase (phosphatidylcholine-retinol-O-acyltransferase)	GO:0006653 1,2-diacyl-sn-glycero-3-phosphocholine metabolic process;GO:0006776 vitamin A metabolic process;GO:0042572 retinol metabolic process	(ko04977)Vitamin digestion and absorption; (mmu04977)Vitamin digestion and absorption; (ko00830)Retinol metabolism
Cxcl15	20309	chemokine (C-X-C motif) ligand 15	GO:0070098 chemokine-mediated signaling pathway;GO:1990868 response to chemokine;GO:1990869 cellular response to chemokine	(ko04062)Chemokine signaling pathway; (mmu04062)Chemokine signaling pathway; (ko04060)Cytokine-cytokine receptor interaction
Ptpn14	19250	protein tyrosine phosphatase, non-receptor type 14	GO:0001946 lymphangiogenesis;GO:0036303 lymph vessel morphogenesis;GO:0001945 lymph vessel development
Il18r1	16182	interleukin 18 receptor 1	GO:0035655 interleukin-18-mediated signaling pathway;GO:0071351 cellular response to interleukin-18;GO:2000554 regulation of T-helper 1 cell cytokine production	(mmu05321)Inflammatory bowel disease (IBD); (ko05321)Inflammatory bowel disease (IBD); (ko04668)TNF signaling pathway
Fgf20	80857	fibroblast growth factor 20	GO:0060043 regulation of cardiac muscle cell proliferation;GO:0060038 cardiac muscle cell proliferation;GO:0008543 fibroblast growth factor receptor signaling pathway	(ko05218)Melanoma; (mmu05218)Melanoma; (ko05224)Breast cancer
Abca1	11303	ATP-binding cassette, sub-family A (ABC1), member 1	GO:0090108 positive regulation of high-density lipoprotein particle assembly;GO:0071403 cellular response to high density lipoprotein particle stimulus;GO:0090107 regulation of high-density lipoprotein particle assembly	(ko04975)Fat digestion and absorption; (mmu04975)Fat digestion and absorption; (ko02010)ABC transporters
Bdnf	12064	brain derived neurotrophic factor	GO:0099083 retrograde trans-synaptic signaling by neuropeptide, modulating synaptic transmission;GO:0061193 taste bud development;GO:0099082 retrograde trans-synaptic signaling by neuropeptide	(ko05030)Cocaine addiction; (mmu05030)Cocaine addiction; (ko04722)Neurotrophin signaling pathway
Bnip3	12176	BCL2/adenovirus E1B interacting protein 3	GO:0071279 cellular response to cobalt ion;GO:0032025 response to cobalt ion;GO:1902109 negative regulation of mitochondrial membrane permeability involved in apoptotic process	(ko05134)Legionellosis; (mmu05134)Legionellosis; (ko04137)Mitophagy - animal
Hmgn1	15312	high mobility group nucleosomal binding domain 1	GO:1901664 regulation of NAD+ ADP-ribosyltransferase activity;GO:1901666 positive regulation of NAD+ ADP-ribosyltransferase activity;GO:0000720 pyrimidine dimer repair by nucleotide-excision repair	(ko05168)Herpes simplex infection; (mmu05168)Herpes simplex infection
Parp1	11545	poly (ADP-ribose) polymerase family, member 1	GO:0018424 peptidyl-glutamic acid poly-ADP-ribosylation;GO:1904762 positive regulation of myofibroblast differentiation;GO:1903516 regulation of single strand break repair	(mmu03410)Base excision repair; (ko03410)Base excision repair; (ko04064)NF-kappa B signaling pathway
Fstl3	83554	follistatin-like 3	GO:0032926 negative regulation of activin receptor signaling pathway;GO:0032925 regulation of activin receptor signaling pathway;GO:0045671 negative regulation of osteoclast differentiation
Nedd9	18003	neural precursor cell expressed, developmentally down-regulated gene 9	GO:0090527 actin filament reorganization;GO:1900026 positive regulation of substrate adhesion-dependent cell spreading;GO:0061098 positive regulation of protein tyrosine kinase activity
Abcg2	26357	ATP binding cassette subfamily G member 2 (Junior blood group)	GO:0097744 urate salt excretion;GO:0015878 biotin transport;GO:0019389 glucuronoside metabolic process	(ko01523)Antifolate resistance; (mmu01523)Antifolate resistance; (ko02010)ABC transporters
Ncbp2	68092	nuclear cap binding protein subunit 2	GO:0031442 positive regulation of mRNA 3'-end processing;GO:0098789 pre-mRNA cleavage required for polyadenylation;GO:0098787 mRNA cleavage involved in mRNA processing	(ko03015)mRNA surveillance pathway; (mmu03015)mRNA surveillance pathway; (ko03040)Spliceosome
Hnrnpu	51810	heterogeneous nuclear ribonucleoprotein U	GO:1902889 protein localization to spindle microtubule;GO:1990280 RNA localization to chromatin;GO:1902423 regulation of attachment of mitotic spindle microtubules to kinetochore	(ko03040)Spliceosome; (mmu03040)Spliceosome
Prdx6	11758	peroxiredoxin 6	GO:0032060 bleb assembly;GO:0098869 cellular oxidant detoxification;GO:0042744 hydrogen peroxide catabolic process	(mmu01100)Metabolic pathways
Ints6	18130	integrator complex subunit 6	GO:0034472 snRNA 3'-end processing;GO:0016180 snRNA processing;GO:0016073 snRNA metabolic process
Gsta3	14859	glutathione S-transferase, alpha 3	GO:0009407 toxin catabolic process;GO:0043387 mycotoxin catabolic process;GO:0046223 aflatoxin catabolic process	(ko00480)Glutathione metabolism; (mmu00480)Glutathione metabolism; (mmu00980)Metabolism of xenobiotics by cytochrome P450
Taf1c	21341	TATA-box binding protein associated factor, RNA polymerase I, C	GO:0006360 transcription by RNA polymerase I;GO:0006351 transcription, DNA-templated;GO:0097659 nucleic acid-templated transcription
Pdf	68023	peptide deformylase (mitochondrial)	GO:0043686 co-translational protein modification;GO:0018206 peptidyl-methionine modification;GO:0031365 N-terminal protein amino acid modification
Pdia6	71853	protein disulfide isomerase associated 6	GO:1903895 negative regulation of IRE1-mediated unfolded protein response;GO:1903894 regulation of IRE1-mediated unfolded protein response;GO:1900102 negative regulation of endoplasmic reticulum unfolded protein response	(ko04141)Protein processing in endoplasmic reticulum; (mmu04141)Protein processing in endoplasmic reticulum
Clptm1l	218335	CLPTM1-like	GO:0006915 apoptotic process;GO:0012501 programmed cell death;GO:0008219 cell death
Gstt3	103140	glutathione S-transferase, theta 3	GO:0006749 glutathione metabolic process;GO:0006575 cellular modified amino acid metabolic process;GO:0006790 sulfur compound metabolic process	(ko00480)Glutathione metabolism; (mmu00480)Glutathione metabolism; (mmu00980)Metabolism of xenobiotics by cytochrome P450
Pdlim2	213019	PDZ and LIM domain 2	GO:0007507 heart development;GO:0061061 muscle structure development;GO:0030036 actin cytoskeleton organization
Ginm1	215751	glycoprotein integral membrane 1	GO:0008150 biological_process
Tspyl4	72480	TSPY-like 4	GO:0006334 nucleosome assembly;GO:0034728 nucleosome organization;GO:0031497 chromatin assembly
Hectd1	207304	HECT domain E3 ubiquitin protein ligase 1	GO:0060708 spongiotrophoblast differentiation;GO:0060712 spongiotrophoblast layer development;GO:0060707 trophoblast giant cell differentiation
Pmm1	29858	phosphomannomutase 1	GO:0009298 GDP-mannose biosynthetic process;GO:0019673 GDP-mannose metabolic process;GO:0006013 mannose metabolic process	(ko00051)Fructose and mannose metabolism; (mmu00051)Fructose and mannose metabolism; (ko00520)Amino sugar and nucleotide sugar metabolism
Tef	21685	thyrotroph embryonic factor	GO:0048511 rhythmic process;GO:0045944 positive regulation of transcription by RNA polymerase II;GO:0045893 positive regulation of transcription, DNA-templated
Acat1	110446	acetyl-Coenzyme A acetyltransferase 1	GO:1902860 propionyl-CoA biosynthetic process;GO:0046356 acetyl-CoA catabolic process;GO:1902858 propionyl-CoA metabolic process	(M00095)C5 isoprenoid biosynthesis, mevalonate pathway; (ko00072)Synthesis and degradation of ketone bodies; (mmu)C5 isoprenoid biosynthesis, mevalonate pathway
Tcea3	21401	transcription elongation factor A (SII), 3	GO:0006355 regulation of transcription, DNA-templated;GO:1903506 regulation of nucleic acid-templated transcription;GO:2001141 regulation of RNA biosynthetic process
Lmcd1	30937	LIM and cysteine-rich domains 1	GO:0070886 positive regulation of calcineurin-NFAT signaling cascade;GO:0106058 positive regulation of calcineurin-mediated signaling;GO:0070884 regulation of calcineurin-NFAT signaling cascade
Arl8a	68724	ADP-ribosylation factor-like 8A	GO:0008089 anterograde axonal transport;GO:0098930 axonal transport;GO:0008088 axo-dendritic transport
Gpsm2	76123	G-protein signalling modulator 2 (AGS3-like, C. elegans)	GO:0031291 Ran protein signal transduction;GO:1905832 positive regulation of spindle assembly;GO:0051661 maintenance of centrosome location
Mylip	218203	myosin regulatory light chain interacting protein	GO:0032799 low-density lipoprotein receptor particle metabolic process;GO:0032802 low-density lipoprotein particle receptor catabolic process;GO:0032803 regulation of low-density lipoprotein particle receptor catabolic process
Arntl	11865	aryl hydrocarbon receptor nuclear translocator-like	GO:0090403 oxidative stress-induced premature senescence;GO:0060137 maternal process involved in parturition;GO:2000074 regulation of type B pancreatic cell development	(ko04710)Circadian rhythm; (mmu04710)Circadian rhythm; (ko04728)Dopaminergic synapse
Epb41l5	226352	erythrocyte membrane protein band 4.1 like 5	GO:0007509 mesoderm migration involved in gastrulation;GO:0009826 unidimensional cell growth;GO:0048319 axial mesoderm morphogenesis
Rapgef4	56508	Rap guanine nucleotide exchange factor (GEF) 4	GO:1904457 positive regulation of neuronal action potential;GO:0098908 regulation of neuronal action potential;GO:0051971 positive regulation of transmission of nerve impulse	(mmu04911)Insulin secretion; (ko04670)Leukocyte transendothelial migration; (mmu04670)Leukocyte transendothelial migration
Cyp2b10	13088	cytochrome P450, family 2, subfamily b, polypeptide 10	GO:0019373 epoxygenase P450 pathway;GO:0042738 exogenous drug catabolic process;GO:0042737 drug catabolic process	(ko00140)Steroid hormone biosynthesis; (ko00830)Retinol metabolism; (ko00590)Arachidonic acid metabolism
Olfm1	56177	olfactomedin 1	GO:0023041 neuronal signal transduction;GO:2001223 negative regulation of neuron migration;GO:1902430 negative regulation of amyloid-beta formation
Sorbs1	20411	sorbin and SH3 domain containing 1	GO:1904393 regulation of skeletal muscle acetylcholine-gated channel clustering;GO:0071340 skeletal muscle acetylcholine-gated channel clustering;GO:0045725 positive regulation of glycogen biosynthetic process	(ko04520)Adherens junction; (mmu04520)Adherens junction; (ko03320)PPAR signaling pathway
Hexim1	192231	hexamethylene bis-acetamide inducible 1	GO:0032897 negative regulation of viral transcription;GO:0046782 regulation of viral transcription;GO:0045736 negative regulation of cyclin-dependent protein serine/threonine kinase activity	(Human)(hsa03015)mRNA surveillance pathway
Trib3	228775	tribbles pseudokinase 3	GO:0045717 negative regulation of fatty acid biosynthetic process;GO:0051443 positive regulation of ubiquitin-protein transferase activity;GO:0045922 negative regulation of fatty acid metabolic process	(Human)(hsa04931)insulin resistance
Ttc39c	72747	tetratricopeptide repeat domain 39C	GO:0032474 otolith morphogenesis;GO:0048840 otolith development;GO:0042472 inner ear morphogenesis
Slc1a3	20512	solute carrier family 1 (glial high affinity glutamate transporter), member 3	GO:0009449 gamma-aminobutyric acid biosynthetic process;GO:0070778 L-aspartate transmembrane transport;GO:0140009 L-aspartate import across plasma membrane	(ko04724)Glutamatergic synapse; (mmu04724)Glutamatergic synapse
Sord	20322	sorbitol dehydrogenase	GO:0006062 sorbitol catabolic process;GO:0019407 hexitol catabolic process;GO:0019519 pentitol metabolic process	(mmunan01)drug metabolism; (mmu00232)Caffeine metabolism; (M00014)Glucuronate pathway (uronate pathway)
Cmas	12764	cytidine monophospho-N-acetylneuraminic acid synthetase	GO:0006055 CMP-N-acetylneuraminate biosynthetic process;GO:0046381 CMP-N-acetylneuraminate metabolic process;GO:0009226 nucleotide-sugar biosynthetic process	(ko00520)Amino sugar and nucleotide sugar metabolism; (mmu00520)Amino sugar and nucleotide sugar metabolism; (mmu01100)Metabolic pathways
Commd7	99311	COMM domain containing 7	GO:0033209 tumor necrosis factor-mediated signaling pathway;GO:0032088 negative regulation of NF-kappaB transcription factor activity;GO:0043433 negative regulation of DNA-binding transcription factor activity
Trmt1l	98685	tRNA methyltransferase 1 like	GO:0002940 tRNA N2-guanine methylation;GO:0030488 tRNA methylation;GO:0001510 RNA methylation
Dapk1	69635	death associated protein kinase 1	GO:0071447 cellular response to hydroperoxide;GO:0002357 defense response to tumor cell;GO:0033194 response to hydroperoxide	(ko05219)Bladder cancer; (mmu05219)Bladder cancer; (ko04140)Autophagy - animal
Trp53bp1	27223	transformation related protein 53 binding protein 1	GO:2000042 negative regulation of double-strand break repair via homologous recombination;GO:2000780 negative regulation of double-strand break repair;GO:0045830 positive regulation of isotype switching	(ko04621)NOD-like receptor signaling pathway; (mmu04621)NOD-like receptor signaling pathway
Trim24	21848	tripartite motif-containing 24	GO:0070562 regulation of vitamin D receptor signaling pathway;GO:0070561 vitamin D receptor signaling pathway;GO:0071305 cellular response to vitamin D
Sult1a1	20887	sulfotransferase family 1A, phenol-preferring, member 1	GO:0018960 4-nitrophenol metabolic process;GO:0008210 estrogen metabolic process;GO:0051923 sulfation	(ko05204)Chemical carcinogenesis; (mmu05204)Chemical carcinogenesis
Car8	12319	carbonic anhydrase 8	GO:0006730 one-carbon metabolic process;GO:0048015 phosphatidylinositol-mediated signaling;GO:0048017 inositol lipid-mediated signaling	(ko00910)Nitrogen metabolism; (mmu00910)Nitrogen metabolism
Pof1b	69693	premature ovarian failure 1B	GO:0003382 epithelial cell morphogenesis;GO:0070830 bicellular tight junction assembly;GO:0120192 tight junction assembly
Cmtm8	70031	CKLF-like MARVEL transmembrane domain containing 8	GO:0042552 myelination;GO:0007272 ensheathment of neurons;GO:0008366 axon ensheathment
Manf	74840	mesencephalic astrocyte-derived neurotrophic factor	GO:0002014 vasoconstriction of artery involved in ischemic response to lowering of systemic arterial blood pressure;GO:0001980 regulation of systemic arterial blood pressure by ischemic conditions;GO:0001976 nervous system process involved in regulation of systemic arterial blood pressure
Pnpla2	66853	patatin-like phospholipase domain containing 2	GO:0010891 negative regulation of sequestering of triglyceride;GO:0010898 positive regulation of triglyceride catabolic process;GO:0006651 diacylglycerol biosynthetic process	(mmu)Acylglycerol degradation; (M00098)Acylglycerol degradation; (mmu04923)Regulation of lipolysis in adipocytes
Glod4	67201	glyoxalase domain containing 4
Phkg2	68961	phosphorylase kinase, gamma 2 (testis)	GO:0005978 glycogen biosynthetic process;GO:0009250 glucan biosynthetic process;GO:0033692 cellular polysaccharide biosynthetic process	(ko04922)Glucagon signaling pathway; (mmu04922)Glucagon signaling pathway; (ko04910)Insulin signaling pathway
Cox20	66359	cytochrome c oxidase assembly protein 20	GO:0033617 mitochondrial cytochrome c oxidase assembly;GO:0008535 respiratory chain complex IV assembly;GO:0017004 cytochrome complex assembly
Zdhhc4	72881	zinc finger, DHHC domain containing 4	GO:0018230 peptidyl-L-cysteine S-palmitoylation;GO:0018231 peptidyl-S-diacylglycerol-L-cysteine biosynthetic process from peptidyl-cysteine;GO:0018345 protein palmitoylation
Sesn1	140742	sestrin 1	GO:0043201 response to leucine;GO:0071233 cellular response to leucine;GO:1990253 cellular response to leucine starvation	(ko04115)p53 signaling pathway; (mmu04115)p53 signaling pathway; (mmu04211)Longevity regulating pathway
Cerk	223753	ceramide kinase	GO:0006672 ceramide metabolic process;GO:0006665 sphingolipid metabolic process;GO:0006643 membrane lipid metabolic process	(ko00600)Sphingolipid metabolism; (mmu00600)Sphingolipid metabolism
Fam214b	230088	family with sequence similarity 214, member B	GO:0008150 biological_process
Nrcam	319504	neuronal cell adhesion molecule	GO:0045162 clustering of voltage-gated sodium channels;GO:0019227 neuronal action potential propagation;GO:0098870 action potential propagation	(mmu04514)Cell adhesion molecules (CAMs); (ko04514)Cell adhesion molecules (CAMs)
Hlf	217082	hepatic leukemia factor	GO:0035914 skeletal muscle cell differentiation;GO:0007519 skeletal muscle tissue development;GO:0060538 skeletal muscle organ development
Tmem106c	380967	transmembrane protein 106C	GO:0008150 biological_process
Coa6	67892	cytochrome c oxidase assembly factor 6	GO:0042774 plasma membrane ATP synthesis coupled electron transport;GO:0008535 respiratory chain complex IV assembly;GO:0017004 cytochrome complex assembly
Slc2a3	20527	solute carrier family 2 (facilitated glucose transporter), member 3	GO:0070837 dehydroascorbic acid transport;GO:0051180 vitamin transport;GO:1904659 glucose transmembrane transport
Cnpy2	56530	canopy FGF signaling regulator 2	GO:1905599 positive regulation of low-density lipoprotein receptor activity;GO:0010988 regulation of low-density lipoprotein particle clearance;GO:0010984 regulation of lipoprotein particle clearance
Cpsf3	54451	cleavage and polyadenylation specificity factor 3	GO:0006398 mRNA 3'-end processing by stem-loop binding and cleavage;GO:0090503 RNA phosphodiester bond hydrolysis, exonucleolytic;GO:0008334 histone mRNA metabolic process	(ko03015)mRNA surveillance pathway; (mmu03015)mRNA surveillance pathway
Nono	53610	non-POU-domain-containing, octamer binding protein	GO:1903377 negative regulation of oxidative stress-induced neuron intrinsic apoptotic signaling pathway;GO:0036480 neuron intrinsic apoptotic signaling pathway in response to oxidative stress;GO:1903376 regulation of oxidative stress-induced neuron intrinsic apoptotic signaling pathway
Ndrg2	29811	N-myc downstream regulated gene 2	GO:0090360 platelet-derived growth factor production;GO:0090361 regulation of platelet-derived growth factor production;GO:0010574 regulation of vascular endothelial growth factor production
Ucp2	22228	uncoupling protein 2 (mitochondrial, proton carrier)	GO:0061179 negative regulation of insulin secretion involved in cellular response to glucose stimulus;GO:0000303 response to superoxide;GO:0000305 response to oxygen radical
Tcn2	21452	transcobalamin 2	GO:0015889 cobalamin transport;GO:0006824 cobalt ion transport;GO:0051180 vitamin transport	(ko04977)Vitamin digestion and absorption; (mmu04977)Vitamin digestion and absorption
Gss	14854	glutathione synthetase	GO:0006750 glutathione biosynthetic process;GO:0019184 nonribosomal peptide biosynthetic process;GO:0046686 response to cadmium ion	(mmu)Glutathione biosynthesis, glutamate => glutathione; (M00118)Glutathione biosynthesis, glutamate => glutathione; (ko04216)Ferroptosis
Tspan4	64540	tetraspanin 4	GO:0065003 protein-containing complex assembly;GO:0043933 protein-containing complex subunit organization;GO:0022607 cellular component assembly
Uqcr11	66594	ubiquinol-cytochrome c reductase, complex III subunit XI	(Human)GO:0006122 mitochondrial electron transport, ubiquinol to cytochrome c;GO:0019646 aerobic electron transport chain;GO:0042773 ATP synthesis coupled electron transport	(ko04260)Cardiac muscle contraction; (mmu04260)Cardiac muscle contraction; (ko00190)Oxidative phosphorylation
Psmg1	56088	proteasome (prosome, macropain) assembly chaperone 1	GO:0080129 proteasome core complex assembly;GO:0043248 proteasome assembly;GO:0051131 chaperone-mediated protein complex assembly
Cilk1	56542	ciliogenesis associated kinase 1	GO:0035720 intraciliary anterograde transport;GO:0035721 intraciliary retrograde transport;GO:0042073 intraciliary transport
Exosc7	66446	exosome component 7	GO:0034473 U1 snRNA 3'-end processing;GO:0034476 U5 snRNA 3'-end processing;GO:0071042 nuclear polyadenylation-dependent mRNA catabolic process	(ko03018)RNA degradation; (mmu03018)RNA degradation
Gyg	27357	glycogenin	GO:0005978 glycogen biosynthetic process;GO:0009250 glucan biosynthetic process;GO:0033692 cellular polysaccharide biosynthetic process	(ko00500)Starch and sucrose metabolism; (mmu00500)Starch and sucrose metabolism; (mmu01100)Metabolic pathways
Srsf6	67996	serine and arginine-rich splicing factor 6	GO:2000675 negative regulation of type B pancreatic cell apoptotic process;GO:0060501 positive regulation of epithelial cell proliferation involved in lung morphogenesis;GO:2000794 regulation of epithelial cell proliferation involved in lung morphogenesis	(ko03040)Spliceosome; (mmu03040)Spliceosome; (ko05168)Herpes simplex infection
Olfml3	99543	olfactomedin-like 3	GO:0008150 biological_process
Psmd3	22123	proteasome (prosome, macropain) 26S subunit, non-ATPase, 3	GO:0042176 regulation of protein catabolic process;GO:0006511 ubiquitin-dependent protein catabolic process;GO:0019941 modification-dependent protein catabolic process	(mmu03050)Proteasome; (ko03050)Proteasome; (ko05169)Epstein-Barr virus infection
Brd7	26992	bromodomain containing 7	GO:0035066 positive regulation of histone acetylation;GO:2000758 positive regulation of peptidyl-lysine acetylation;GO:1901985 positive regulation of protein acetylation
Dhcr7	13360	7-dehydrocholesterol reductase	GO:0016128 phytosteroid metabolic process;GO:0016129 phytosteroid biosynthetic process;GO:0016131 brassinosteroid metabolic process	(mmu)Cholesterol biosynthesis, squalene 2,3-epoxide => cholesterol; (M00101)Cholesterol biosynthesis, squalene 2,3-epoxide => cholesterol; (ko00100)Steroid biosynthesis
Enpep	13809	glutamyl aminopeptidase	GO:0043171 peptide catabolic process;GO:0003081 regulation of systemic arterial blood pressure by renin-angiotensin;GO:0001990 regulation of systemic arterial blood pressure by hormone	(ko04614)Renin-angiotensin system; (mmu04614)Renin-angiotensin system
Dkk3	50781	dickkopf WNT signaling pathway inhibitor 3	GO:0032345 negative regulation of aldosterone metabolic process;GO:0032348 negative regulation of aldosterone biosynthetic process;GO:2000065 negative regulation of cortisol biosynthetic process
Ccnd1	12443	cyclin D1	GO:0000320 re-entry into mitotic cell cycle;GO:0033601 positive regulation of mammary gland epithelial cell proliferation;GO:0033327 Leydig cell differentiation	(ko05216)Thyroid cancer; (mmu05216)Thyroid cancer; (ko05219)Bladder cancer
Car2	12349	carbonic anhydrase 2	GO:0090088 regulation of oligopeptide transport;GO:0090089 regulation of dipeptide transport;GO:2000878 positive regulation of oligopeptide transport	(ko00910)Nitrogen metabolism; (mmu00910)Nitrogen metabolism; (ko04964)Proximal tubule bicarbonate reclamation
Elk3	13713	ELK3, member of ETS oncogene family	GO:0042060 wound healing;GO:0009611 response to wounding;GO:0001525 angiogenesis
Hpcal1	53602	hippocalcin-like 1	GO:0008150 biological_process
Hp	15439	haptoglobin	GO:0006953 acute-phase response;GO:0031638 zymogen activation;GO:0002526 acute inflammatory response
Bloc1s5	17828	biogenesis of lysosomal organelles complex-1, subunit 5, muted	GO:0032474 otolith morphogenesis;GO:0050942 positive regulation of pigment cell differentiation;GO:0048087 positive regulation of developmental pigmentation
Sh3d19	27059	SH3 domain protein D19	GO:0051044 positive regulation of membrane protein ectodomain proteolysis;GO:0051043 regulation of membrane protein ectodomain proteolysis;GO:0006509 membrane protein ectodomain proteolysis
Fdx1	14148	ferredoxin 1	GO:0070995 NADPH oxidation;GO:0006739 NADP metabolic process;GO:0071320 cellular response to cAMP
Ostc	66357	oligosaccharyltransferase complex subunit (non-catalytic)	GO:0006486 protein glycosylation;GO:0043413 macromolecule glycosylation;GO:0070085 glycosylation
Kcnk2	16526	potassium channel, subfamily K, member 2	GO:1900039 positive regulation of cellular response to hypoxia;GO:0030322 stabilization of membrane potential;GO:1900037 regulation of cellular response to hypoxia	(ko04971)Gastric acid secretion; (mmu04971)Gastric acid secretion
Comt	12846	catechol-O-methyltransferase	GO:0031337 positive regulation of sulfur amino acid metabolic process;GO:0050666 regulation of homocysteine metabolic process;GO:0050668 positive regulation of homocysteine metabolic process	(ko00350)Tyrosine metabolism; (mmu00350)Tyrosine metabolism; (ko00140)Steroid hormone biosynthesis
Vegfd	14205	vascular endothelial growth factor D	GO:0060754 positive regulation of mast cell chemotaxis;GO:0060753 regulation of mast cell chemotaxis;GO:0002551 mast cell chemotaxis	(ko04933)AGE-RAGE signaling pathway in diabetic complications; (mmu04933)AGE-RAGE signaling pathway in diabetic complications; (ko04510)Focal adhesion
Pkp2	67451	plakophilin 2	GO:0002159 desmosome assembly;GO:0048496 maintenance of animal organ identity;GO:0086073 bundle of His cell-Purkinje myocyte adhesion involved in cell communication	(ko05412)Arrhythmogenic right ventricular cardiomyopathy (ARVC); (mmu05412)Arrhythmogenic right ventricular cardiomyopathy (ARVC)
Map3k6	53608	mitogen-activated protein kinase kinase kinase 6	GO:0000165 MAPK cascade;GO:0006468 protein phosphorylation;GO:0033554 cellular response to stress	(ko04010)MAPK signaling pathway; (mmu04010)MAPK signaling pathway
Tmod4	50874	tropomodulin 4	GO:0051694 pointed-end actin filament capping;GO:0051693 actin filament capping;GO:0030835 negative regulation of actin filament depolymerization
Selenbp1	20341	selenium binding protein 1	GO:0050873 brown fat cell differentiation;GO:0045444 fat cell differentiation;GO:0015031 protein transport
Azin1	54375	antizyme inhibitor 1	GO:1902269 positive regulation of polyamine transmembrane transport;GO:0033387 putrescine biosynthetic process from ornithine;GO:1902267 regulation of polyamine transmembrane transport
Cdh11	12552	cadherin 11	GO:0021957 corticospinal tract morphogenesis;GO:0021952 central nervous system projection neuron axonogenesis;GO:0016339 calcium-dependent cell-cell adhesion via plasma membrane cell adhesion molecules
Xdh	22436	xanthine dehydrogenase	GO:0010044 response to aluminum ion;GO:2001213 negative regulation of vasculogenesis;GO:0009114 hypoxanthine catabolic process	(ko00232)Caffeine metabolism; (mmu00232)Caffeine metabolism; (mmu00983)Drug metabolism - other enzymes
Ypel5	383295	yippee like 5	GO:0008150 biological_process
Pcca	110821	propionyl-Coenzyme A carboxylase, alpha polypeptide	GO:0016042 lipid catabolic process;GO:0006629 lipid metabolic process;GO:1901575 organic substance catabolic process	(mmu)Propanoyl-CoA metabolism, propanoyl-CoA => succinyl-CoA; (M00741)Propanoyl-CoA metabolism, propanoyl-CoA => succinyl-CoA; (ko00630)Glyoxylate and dicarboxylate metabolism
Spg20	229285	spastic paraplegia 20, spartin (Troyer syndrome) homolog (human)	GO:0048698 negative regulation of collateral sprouting in absence of injury;GO:0048696 regulation of collateral sprouting in absence of injury;GO:0048669 collateral sprouting in absence of injury	(ko04144)Endocytosis; (mmu04144)Endocytosis
Bcs1l	66821	BCS1-like (yeast)	GO:0032979 protein insertion into mitochondrial inner membrane from matrix;GO:0032978 protein insertion into membrane from inner side;GO:0017062 respiratory chain complex III assembly
Acly	104112	ATP citrate lyase	GO:0006101 citrate metabolic process;GO:0006107 oxaloacetate metabolic process;GO:0072350 tricarboxylic acid metabolic process	(ko00020)Citrate cycle (TCA cycle); (mmu00020)Citrate cycle (TCA cycle); (mmu01100)Metabolic pathways
Carmil1	68732	capping protein regulator and myosin 1 linker 1	GO:0051638 barbed-end actin filament uncapping;GO:0051695 actin filament uncapping;GO:2000813 negative regulation of barbed-end actin filament capping
Loxl1	16949	lysyl oxidase-like 1	GO:0018057 peptidyl-lysine oxidation;GO:0018158 protein oxidation;GO:0030199 collagen fibril organization
H6pd	100198	hexose-6-phosphate dehydrogenase (glucose 1-dehydrogenase)	GO:0009051 pentose-phosphate shunt, oxidative branch;GO:2000064 regulation of cortisol biosynthetic process;GO:0034651 cortisol biosynthetic process	(M00006)Pentose phosphate pathway, oxidative phase, glucose 6P => ribulose 5P; (mmu)Pentose phosphate pathway, oxidative phase, glucose 6P => ribulose 5P; (mmu)Pentose phosphate pathway (Pentose phosphate cycle)
Chpf2	100910	chondroitin polymerizing factor 2	GO:0030206 chondroitin sulfate biosynthetic process;GO:0050650 chondroitin sulfate proteoglycan biosynthetic process;GO:0030204 chondroitin sulfate metabolic process	(mmu)Glycosaminoglycan biosynthesis, chondroitin sulfate backbone; (M00058)Glycosaminoglycan biosynthesis, chondroitin sulfate backbone; (ko00532)Glycosaminoglycan biosynthesis - chondroitin sulfate / dermatan sulfate
Pcbd2	72562	pterin 4 alpha carbinolamine dehydratase/dimerization cofactor of hepatocyte nuclear factor 1 alpha (TCF1) 2	GO:0006729 tetrahydrobiopterin biosynthetic process;GO:0046146 tetrahydrobiopterin metabolic process;GO:0042559 pteridine-containing compound biosynthetic process
Glipr2	384009	GLI pathogenesis-related 2	GO:0010718 positive regulation of epithelial to mesenchymal transition;GO:0010717 regulation of epithelial to mesenchymal transition;GO:0001837 epithelial to mesenchymal transition
Slc37a3	72144	solute carrier family 37 (glycerol-3-phosphate transporter), member 3	GO:0008643 carbohydrate transport;GO:0055085 transmembrane transport;GO:0071702 organic substance transport
Rere	68703	arginine glutamic acid dipeptide (RE) repeats	GO:0021691 cerebellar Purkinje cell layer maturation;GO:0021699 cerebellar cortex maturation;GO:0021590 cerebellum maturation
Ckb	12709	creatine kinase, brain	GO:0006599 phosphagen metabolic process;GO:0006603 phosphocreatine metabolic process;GO:0042396 phosphagen biosynthetic process	(mmu)Creatine pathway; (M00047)Creatine pathway; (ko00330)Arginine and proline metabolism
Serinc3	26943	serine incorporator 3	GO:0009597 detection of virus;GO:1902237 positive regulation of endoplasmic reticulum stress-induced intrinsic apoptotic signaling pathway;GO:0006658 phosphatidylserine metabolic process
Wdr6	83669	WD repeat domain 6	GO:0030488 tRNA methylation;GO:0001510 RNA methylation;GO:0010507 negative regulation of autophagy
Dynll1	56455	dynein light chain LC8-type 1	GO:1902857 positive regulation of non-motile cilium assembly;GO:0035721 intraciliary retrograde transport;GO:1902855 regulation of non-motile cilium assembly	(ko04962)Vasopressin-regulated water reabsorption; (mmu04962)Vasopressin-regulated water reabsorption
Mrpl28	68611	mitochondrial ribosomal protein L28	GO:0008150 biological_process	(ko03010)Ribosome; (mmu03010)Ribosome
Itpr1	16438	inositol 1,4,5-trisphosphate receptor 1	GO:0050882 voluntary musculoskeletal movement;GO:0042045 epithelial fluid transport;GO:0097421 liver regeneration	(ko04730)Long-term depression; (mmu04730)Long-term depression; (ko04720)Long-term potentiation
Cd55	13136	CD55 molecule, decay accelerating factor for complement	GO:2000563 positive regulation of CD4-positive, alpha-beta T cell proliferation;GO:0045959 negative regulation of complement activation, classical pathway;GO:1903659 regulation of complement-dependent cytotoxicity	(ko04610)Complement and coagulation cascades; (ko04640)Hematopoietic cell lineage; (mmu05416)Viral myocarditis
Paqr7	71904	progestin and adipoQ receptor family member VII	GO:0048477 oogenesis;GO:0007292 female gamete generation;GO:0048545 response to steroid hormone
Ceacam1	26365	carcinoembryonic antigen-related cell adhesion molecule 1	GO:0070237 positive regulation of activation-induced cell death of T cells;GO:0038158 granulocyte colony-stimulating factor signaling pathway;GO:1901143 insulin catabolic process
Ppl	19041	periplakin	GO:0031424 keratinization;GO:0045104 intermediate filament cytoskeleton organization;GO:0045103 intermediate filament-based process
